# Supplementary material for: Performance of cardiopulmonary exercise testing for the prediction of post-operative complications in non cardiopulmonary surgery: A systematic review
Source: PubMed Central journal article supplement (PMC6996804; doi:10.1371/journal.pone.0226480), 2020-02-03
Supplement: pone.0226480.s001.pdf [file pone.0226480.s001.pdf]

**S1 Appendix: Literature Search Strategy** (example given for repeat search – same terms used for initial search, see methods)

Database: Ovid MEDLINE(R) and Epub Ahead of Print, In-Process & Other Non-Indexed Citations, Daily, and Versions(R) <1946 to July 24, 2018>

Search Strategy:

- 
- 1 exp postoperative complication/ or postoperative.mp. or exp postoperative period/ (827536)
  - 2 post?operative.mp. (715899)
  - 3 post?surg\*.mp. (17054)
  - 4 post?an?esth\*.mp. (4123)
  - 5 ((post\* or after\*) adj3 (surg\* or operat\* or an?esth\*)).mp. [mp=title, abstract, original title, name of substance word, subject heading word, floating sub-heading word, keyword heading word, protocol supplementary concept word, rare disease supplementary concept word, unique identifier, synonyms] (448032)
  - 6 myocardial infarction.mp. or exp heart infarction/ (225744)
  - 7 exp acute heart infarction/ or exp heart infarction/ or MI.mp. (41812)
  - 8 cardiac arrest.mp. or exp heart arrest/ (55523)
  - 9 arrhythmia.mp. or exp heart arrhythmia/ (64504)
  - 10 heart failure.mp. or exp heart failure/ (182275)
  - 11 congestive cardiac failure.mp. or exp congestive heart failure/ (108906)
  - 12 angina.mp. or exp angina pectoris/ (67035)
  - 13 stroke.mp. or exp cerebrovascular accident/ (272135)
  - 14 major adverse cardiac event\*.mp. (5433)
  - 15 (MACE or MACCE).mp. [mp=title, abstract, original title, name of substance word, subject heading word, floating sub-heading word, keyword heading word, protocol supplementary concept word, rare disease supplementary concept word, unique identifier, synonyms] (6493)
  - 16 exp death/ or death.mp. (758831)
  - 17 exp mortality/ or mortality.mp. (1112088)
  - 18 ((unplanned or unexpect\* or unintentional or unnecessary) adj3 (ITU or ICU or intensive care unit)).mp. [mp=title, abstract, original title, name of substance word, subject heading word, floating sub-heading word, keyword heading word, protocol supplementary concept word, rare disease supplementary concept word, unique identifier, synonyms] (345)
  - 19 exp pneumonia/ or exp aspiration pneumonia/ or exp hospital acquired pneumonia/ or pneumonia.mp. (141779)
  - 20 (respiratory infection or LRTI or lower respiratory tract infection).mp. [mp=title, abstract, original title, name of substance word, subject heading word, floating sub-heading word, keyword heading word, protocol supplementary concept word, rare disease supplementary concept word, unique identifier, synonyms] (11150)
  - 21 respiratory failure.mp. or exp respiratory failure/ (76013)

- 22 exp hypoxia/ or hypoxia.mp. (142339)
- 23 hypercarbia.mp. or exp hypercapnia/ (9227)
- 24 pleural effusion.mp. or exp pleura effusion/ (27496)
- 25 pneumothorax.mp. or exp pneumothorax/ (25299)
- 26 bronchospasm.mp. or exp bronchospasm/ (7245)
- 27 atelectasis.mp. or exp atelectasis/ (10708)
- 28 (aspiration adj pneumonitis).mp. [mp=title, abstract, original title, name of substance word, subject heading word, floating sub-heading word, keyword heading word, protocol supplementary concept word, rare disease supplementary concept word, unique identifier, synonyms] (460)
- 29 cardio?pulmonary exercise test.mp. or exp cardiopulmonary exercise test/ (59968)
- 30 CPET.mp. (1036)
- 31 CPEX.mp. (17)
- 32 or/1-5 (1087570)
- 33 or/6-28 (2556975)
- 34 or/29-31 (60238)
- 35 and/32-34 (1225)
- 36 limit 35 to yr="2017 -Current" (38)
