# Supplementary material for: Performance of cardiopulmonary exercise testing for the prediction of post-operative complications in non cardiopulmonary surgery: A systematic review
Source: PubMed Central journal article supplement (PMC6996804; doi:10.1371/journal.pone.0226480), 2020-02-03
Supplement: pone.0226480.s007.pdf [file pone.0226480.s007.pdf]

## Supplementary Table S1

| Study               | Outcome              | CPET Variable                 | AUC              |
|---------------------|----------------------|-------------------------------|------------------|
| Forshaw (2008)      | Cardiorespiratory    | VO2 peak                      | 0.63 [0.5-0.76]  |
| Junejo (2012)       | Mortality(30D)       | AT                            | 0.86             |
|                     | Mortality (hospital) | AT                            | 0.83             |
|                     | Cardiorespiratory    | VE/VCO2                       | 0.65[0.53-0.77]  |
| Moyes (2013)        | Cardiorespiratory    | AT                            | 0.60[0.48-0.72]  |
|                     | Cardiorespiratory    | VO2 peak                      | 0.62[0.50-0.74]  |
| Snowden (2013)      | Mortality (hospital) | AT                            | 0.75[0.65-0.85]  |
| Ting (2013)         | Unplanned ICU        | Model(AT+BMI+Desensitisation) | 0..93            |
| James (2014)        | Cardiovascular       | AT                            | 0.83[0.69-0.96]  |
|                     | Cardiovascular       | VO2 peak                      | 0.81[0.68-0.93]  |
| Junejo (2014)       | Mortality(30D)       | VE/VCO2                       | 0.95[0.89-1.02]* |
|                     | Mortality(Hospital)  | VE/VCO2                       | 0.84[0.63-1.07]* |
| Nikolopoulos (2015) | Cardiorespiratory    | AT                            | 0.66 [0.35-0.97] |
| Kanakaraj (2017)    | Cardiovascular       | Peak VO2                      | 0.54[0.27-0.81]  |
|                     | Cardiovascular       | AT                            | 0.57[0.30-0.85]  |
|                     | Cardiovascular       | VE/VCO2                       | 0.73[0.41-1]     |

**Table S1: Published values of area under the receiver operator curve (AUC) from studies. Brackets indicate published 95\% confidence intervals. Asterisk indicates that published confidence interval crosses 1 (likely calculated as a normal approximation)**
