# Supplementary material for: Performance of cardiopulmonary exercise testing for the prediction of post-operative complications in non cardiopulmonary surgery: A systematic review
Source: PubMed Central journal article supplement (PMC6996804; doi:10.1371/journal.pone.0226480), 2020-02-03
Supplement: pone.0226480.s008.pdf [file pone.0226480.s008.pdf]

## Supplementary Table S2

| Study            | Outcome           | Predictor                      | Finding                              |
|------------------|-------------------|--------------------------------|--------------------------------------|
| Ausania (2012)   | Mortality         | MET Score > 7                  | Sensitivity 83% Specificity 61%      |
| Junejo (2012)    | 30D Mortality     | High v Low risk groups         | Sensitivity 100% Specificity 39.2%*  |
| Junejo (2012)    | In-hosp mortality | High v Low risk groups         | Sensitivity 87.5% Specificity 39.6%* |
| Junejo (2014)    | 30D Mortality     | High v Low risk groups)        | Sensitivity 100% Specificity 41.3%   |
| Junejo (2014)    | In-hosp mortality | High v Low risk groups         | Sensitivity 100% Specificity 43%     |
| James (2014)     | MACE              | eGFR                           | AUC:0.72[0.54-0.90]                  |
| James (2014)     | MACE              | BNP                            | AUC:0.75[0.59-0.92]                  |
| James (2014)     | MACE              | CRP                            | AUC:0.56[0.36-0.76]                  |
| James (2014)     | MACE              | ASA                            | AUC:0.68[0.49-0.87]                  |
| James (2014)     | MACE              | RCRI                           | AUC:0.68[0.49-0.86]                  |
| Kanakaraj (2017) | MACE              | NT-proBNP                      | AUC 0.86[0.73-0.98]                  |
| Bowles (2008)    | Mortality         | POSSUM 30                      | OR:12.6[1.59-100.2]                  |
| Bowles (2008)    | Mortality         | ASA 3 or more                  | OR:11.33[1.43-89.87]                 |
| Bowles (2008)    | Mortality         | 2 or more comorbidities        | OR:6.2[1.9-20.32]                    |
| Wilson (2010)    | Mortality         | > 1 Cardiac risk factor        | Sensitivity 44.4% Specificity 68.3%  |
| Wilson (2010)    | Mortality         | > 1 Cardiac risk factor+AT <11 | Sensitivity 87.5% Specificity 32.7%  |
| Wilson (2010)    | Mortality         | No RF+AT<11                    | Sensitivity 90.0% Specificity 53.4%  |
| Wilson (2010)    | Mortality         | IHD                            | Sensitivity 38.9% Specificity 83.6%  |
| Wilson (2010)    | Mortality         | IHD + AT<11                    | Sensitivity 85.7% Specificity 25.7%  |

**Table S4:** Data pertaining to non CPET based predictors explored in included studies. MET = Metabolic equivalents, BNP = B type natriuretic peptide, NT-proBNP = N-terminal pro b-type natriuretic peptide, eGFR = estimated glomerular filtration rate, CRP = C Reactive Protein, ASA = American Society of Anesthesiologists score, RF = Risk Factors, IHD = Ischaemic Heart Disease, AT = Anaerobic Threshold, RCRI = Revised Cardiac Risk Index. POSSUM = Physiological and Operative Severity Score for the Enumeration of Morbidity and Mortality. AUC = Area under the receiver operator curve, OR = Odds ratio, \* calculations exclude 14 high risk patients who didn't proceed to surgery based 'partly' on CPET findings and calculated from data in Table 1 in the original paper.
